# Supplementary material
Source: PubMed Central journal article supplement (PMC4081324)
Supplement: supp_pp.114.236026_236026supplemental_tables_final.pdf [file supp_pp.114.236026_236026supplemental_tables_final.pdf]

Supplemental Table I: Primers used for genotyping

| <b>Mutant</b>                                             | <b>Forward Primer</b>      | <b>Reverse Primer</b>      |
|-----------------------------------------------------------|----------------------------|----------------------------|
| <i>ibr1-1</i> <sup>1</sup><br>At4G05530                   | CGCAACTCACTTTCATCGCTTAGAG  | TGAAAGTGAGAGATGGTGAAACCTGT |
| <i>ibr3-1</i> <sup>2</sup><br>At3G06810                   | ATGGTGCAGTCTTCCAGGGCCTAACC | GAGGATTCGAGATTGCTCAGGTAATA |
| <i>ill2-2</i> <sup>3</sup><br><i>genomic</i><br>At5G56660 | GCATGCTTGTGGACATGATGGTCA   | AAATAGCTTCGACGTTCTTC       |
| <i>ill2-2</i><br><i>insertion</i>                         | GTCAGTTTCACGTGAAACCAA      | GCCTTTTCAGAAATGGATAAATAGCC |
| <i>iar3-6</i><br><i>genomic</i>                           | ATAGAAGCTTGACACTGCATAAC    | GCAACTCAAGAAAAGAATTGAGC    |
| <i>iar3-6</i><br><i>insertion</i><br>At1G51760            | ATAGAAGCTTGACACTGCATAAC    | CAAACCAGCGTGGACCGCTTGCTGCA |
| <i>ilr1-5</i> <sup>4</sup><br>At3G02875                   | CAATCATCGCTTCCGCTA         | CCACGCAGCTACACCGCA         |
| <i>mes17</i><br><i>genomic</i>                            | CTCCGGCGTAATCGATGGCGGAGGA  | CACCATGTTCTGATAGATCAGGCACT |
| <i>mes17</i><br><i>insertion</i><br>At3G10870             | CACCATGTTCTGATAGATCAGGCACT | CAAACCAGCGTGGACCGCTTGCTGCA |

1, product must be digested with *AluI*; 2, product must be digested with *PstI*; 3, product must be digested with *BspHI*; 4, product must be digested with *RsaI*

Supplemental Table II: Primers used for qPCR

| <b>Target</b>             | <b>Forward Primer</b>    | <b>Reverse Primer</b>    |
|---------------------------|--------------------------|--------------------------|
| <i>YUC1</i><br>At4G32540  | ACCTCGTCCGACATAACGCATC   | TCCCTTGGCAACACATGAACGG   |
| <i>YUC2</i><br>At4G13260  | TTTGGACGTTGGCACTCTTGC    | CGTTTCAACTCCGGATACACCTTG |
| <i>YUC3</i><br>At1G04610  | ATGGTCGTTTCGTAGCGCTGTTC  | GCGAGCCAAACGGGCATATACTTC |
| <i>YUC4</i><br>At5G11320  | AATGTACCCGATTGGCTTAAGGAG | ACCCACCGTGTATAGTCCCTTC   |
| <i>YUC5</i><br>At5G43890  | AACGCGTGGAAAGGGAAATCGG   | TCTGCTGATGCTCCAGCCAATC   |
| <i>YUC7</i><br>At2G33230  | ACTCAGGCATGGAAGTCTCTCTTG | AACGGAGCTTCGAACGACCATTG  |
| <i>YUC8</i><br>At4G28720  | GCGGTTGGGTTTACGAGGAAAG   | TGCGATCTTAACCGCGTCCATTG  |
| <i>YUC9</i><br>At1G04180  | AGTCCGGCGAGAAATTCAGAGG   | AACATGAACCGAGCTTCTAACGAC |
| <i>YUC10</i><br>At1G48910 | TCCGTTTGCAATTGGTTAGAGGAC | TTTGGCATCGGTGCTTTGGG     |
| <i>TAA1</i><br>At1G70560  | TTCGTGGTCAATCTGGATCATGG  | ACACCTGTCACCCATCTTCCTC   |
| <i>TAR2</i><br>At4G24670  | GCTCTTCACTGCTTCAAAGAGCAC | TCTGTCTTTCACCAAAGCCCATCC |
| <i>NIT1</i><br>At3G44310  | GCATTGTACGCCAAAGGCATTGAG | GAATTGGCAAGCCGACAAGACG   |

|              |                          |                            |
|--------------|--------------------------|----------------------------|
| <i>NIT2</i>  | GCTTTGTACGCCAAAGGCATTGAG | AGAACTGGCAAGCCGACAATACG    |
| At3G44300    |                          |                            |
| <i>MES17</i> | ACCACTCATCGACTTCCTCTCCTC | GTGACCCACAAGTATCACCTGTTC   |
| <i>IAA18</i> | AGACAAGGAGGCATGTTTGTGAAG | TTTGAGCTGCAAGAAGACCTCTG    |
| At1G51950    |                          |                            |
| <i>AUX1</i>  | CAGCTGCGCATCTAACCAAGTG   | GATGAGATAAGCAGTCCAGCTTCC   |
| At2G38120    |                          |                            |
| <i>STY1</i>  | ACCGGCAACTTCATCGTCTCTTG  | TGCCAACTTCTAGCCCTGAATGAG   |
| At3G51060    |                          |                            |
| <i>PLT3</i>  | GCTGTTGTGGCTGTGGAAACATC  | TCTTCCCGTCCATCTATGTCCGAG   |
| At5G10510    |                          |                            |
| <i>PLT5</i>  | AGCTTTCTCCACTTCTCCAGTCG  | TGGTCTTGTTGTCGTCGTTGAGG    |
| At5G57390    |                          |                            |
| <i>PLT7</i>  | AGATCTTTACCTCGGAACCTTTCG | TGCAATGTCATAAGCCTCTGCTG    |
| At5G65510    |                          |                            |
| <i>IBR3</i>  | TTCTCGCAATGGCCAAGGTTGC   | GCTGCTCCATGAACTTGTATTGCC   |
| <i>IBR1</i>  | ATCACCGGTAGCTCTGAAGTGAGG | ATGTCTCCCGTTGTTCCCAACC     |
| <i>ECH2</i>  | ATGGGCAGGATTTGATCCAGGTC  | ACTGCTGCCCATGCAACAAGAG     |
| At1G76150    |                          |                            |
| <i>IAR3</i>  | AGGCGGTGGTGCTTTCAATGTG   | CGCTTGCCTTGTGATAACCTGCTC   |
| <i>TFL2</i>  | GACAATGTCCAGGAAGTGTTGGTG | TGCTTCCTTCCCATCAGACCTC     |
| At5G17690    |                          |                            |
| <i>UBQ10</i> | TTGGAGGATGGCAGAACTCTTGCT | AGTTTTCCCAGTCAACGTCTTAACGA |
| At4G05320    |                          |                            |
