# Supplementary material
Source: PubMed Central journal article supplement (PMC4081324)

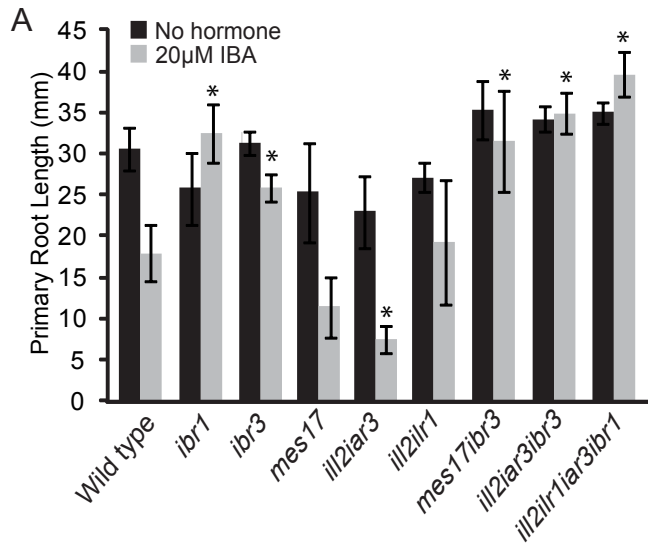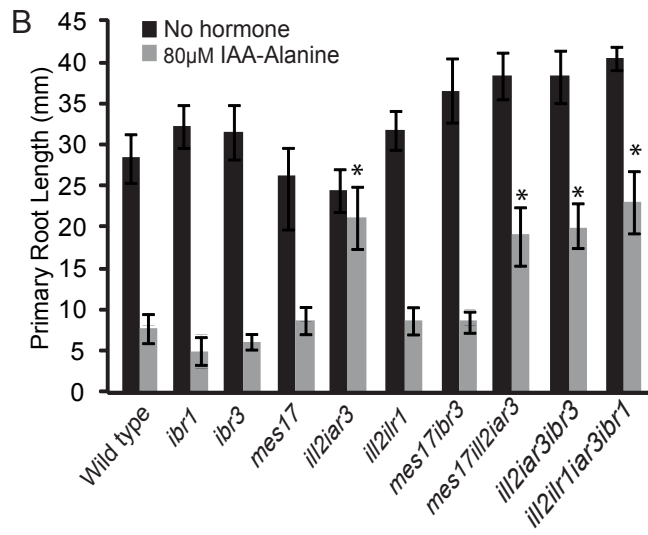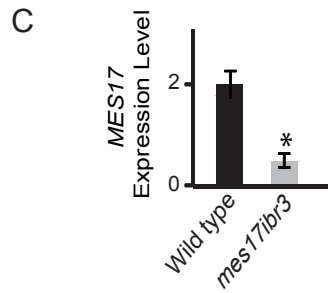

Supplement: supp_pp.114.236026_236026Supp_Figure_1_final.pdf [file supp_pp.114.236026_236026Supp_Figure_1_final.pdf]

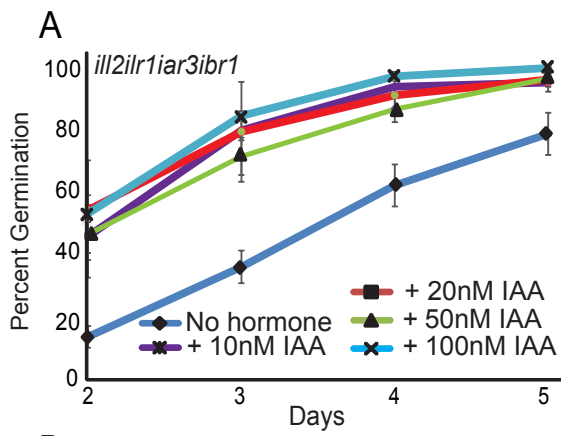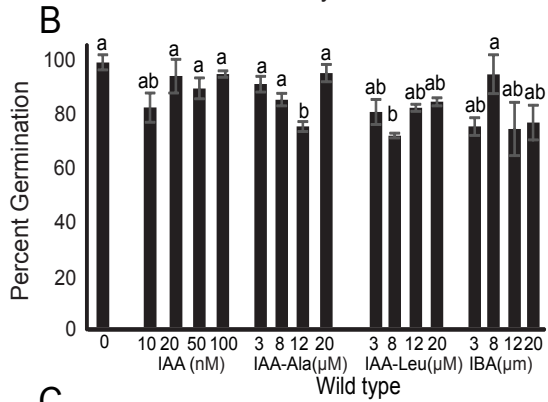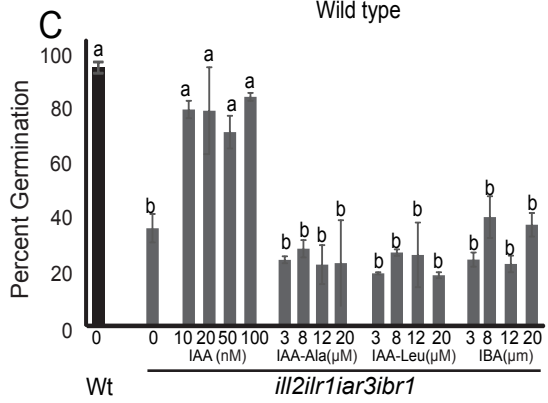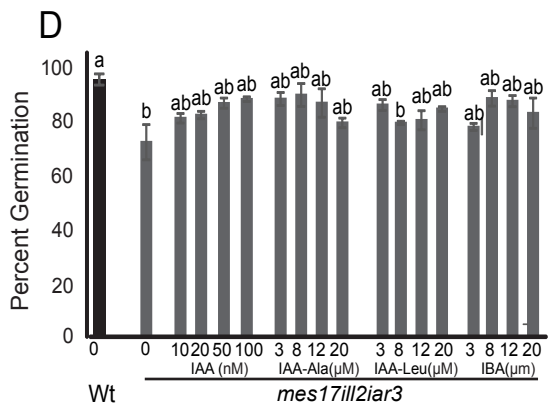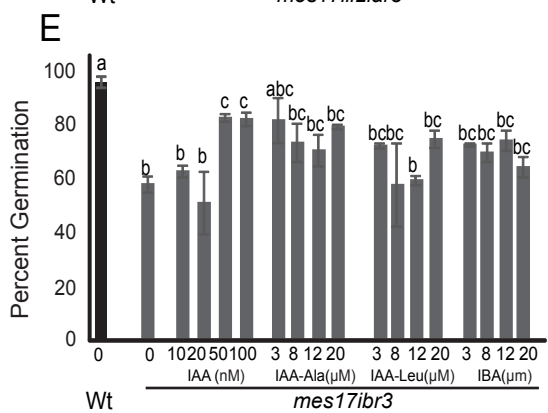

Supplement: supp_pp.114.236026_236026Supp_Figure_2_final.pdf [file supp_pp.114.236026_236026Supp_Figure_2_final.pdf]

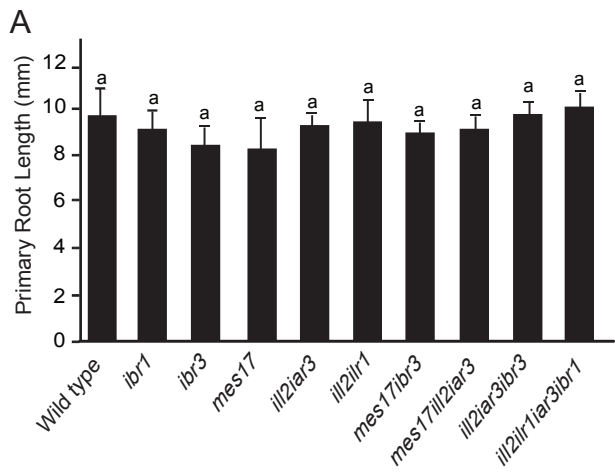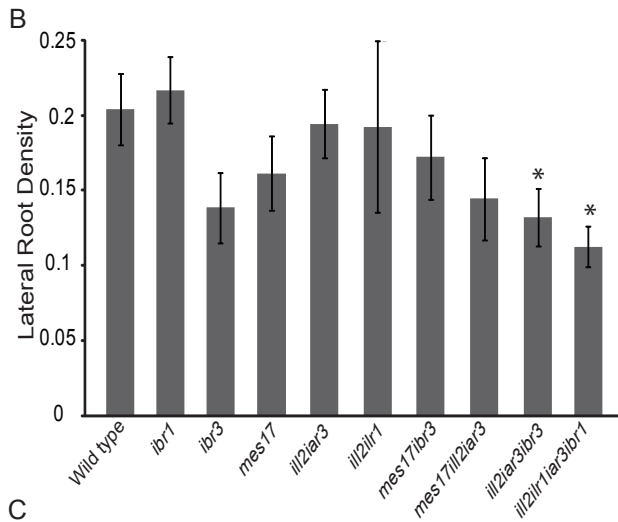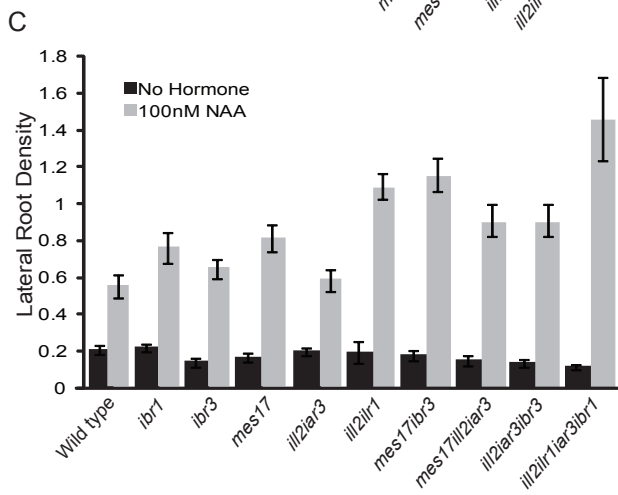

Supplement: supp_pp.114.236026_236026Supp_Figure_3_final.pdf [file supp_pp.114.236026_236026Supp_Figure_3_final.pdf]

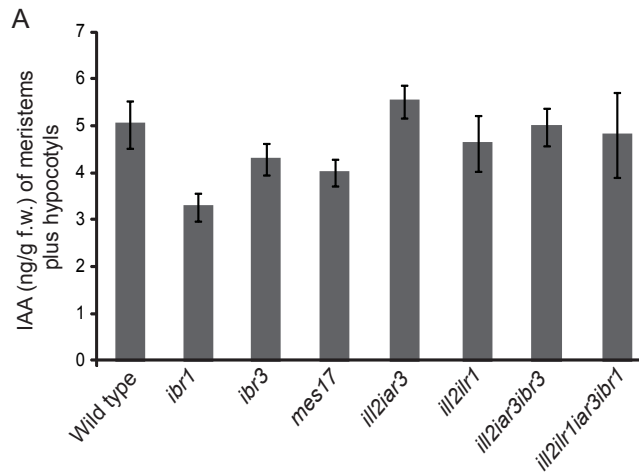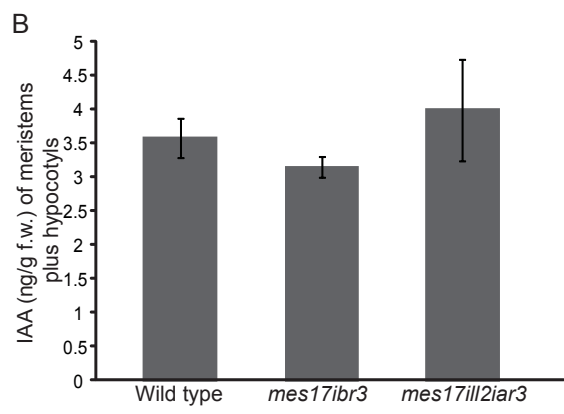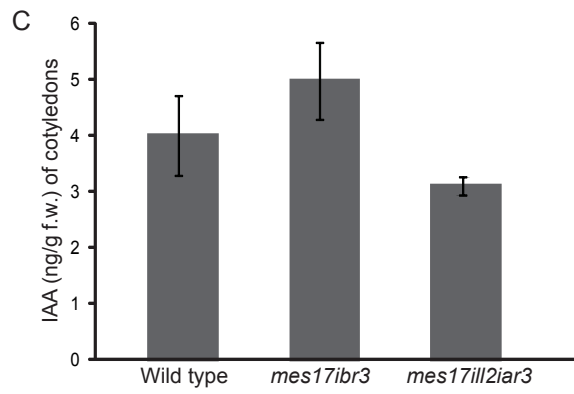

Supplement: supp_pp.114.236026_236026Supp_Figure_4__final.pdf [file supp_pp.114.236026_236026Supp_Figure_4__final.pdf]

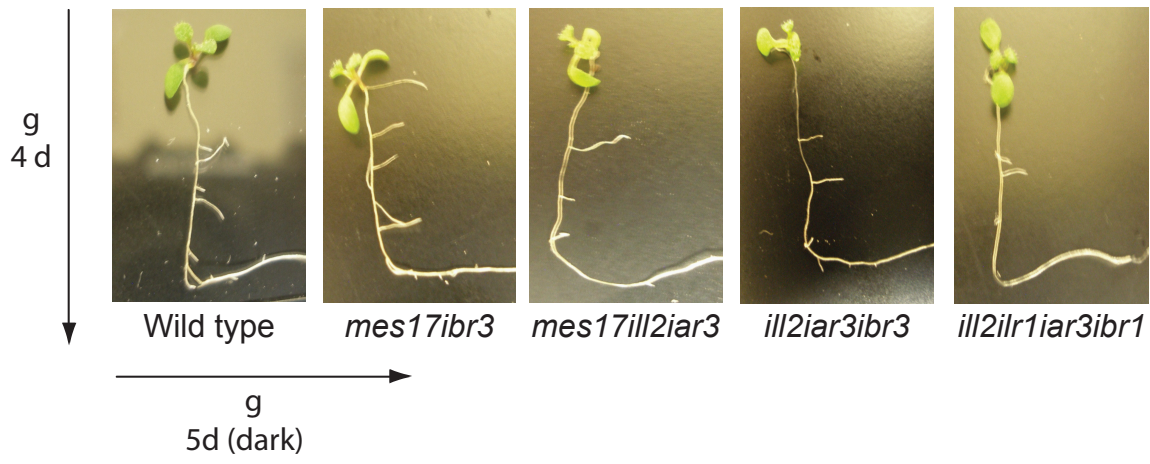

Supplement: supp_pp.114.236026_236026Supp_Figure_5_final.pdf [file supp_pp.114.236026_236026Supp_Figure_5_final.pdf]
